# Supplementary material
Source: MDPI journal article supplement (https://www.mdpi.com/2409-515X/8/3/45)
Supplement: s1 [file s1]

**Table S1: Model parameter and expected values with ranges for Markov model**

| Parameters                                                                | Expected values           | Distribution | Low         | High        | Source     |
|---------------------------------------------------------------------------|---------------------------|--------------|-------------|-------------|------------|
| <b>Cost parameters</b>                                                    | US\$ (A\$)                |              |             |             |            |
| Screening test cost                                                       | \$4.82 (\$7)              | Gamma        | -10%        | +10%        | NBS Pilot  |
| Repeat screening test cost                                                | \$6.89 (\$10)             | Gamma        | 7           | 25          | NBS Pilot  |
| SMA1 annual cost                                                          | \$115,858 (\$231,717)     | Gamma        | \$50,000    | \$490,000   | [34]       |
| SMA2 annual cost                                                          | \$76,234 (\$152,469)      | Gamma        | \$40,000    | \$360,000   | [34]       |
| SMA3 annual cost                                                          | \$47,983 (\$95,966)       | Gamma        | \$20,000    | \$180,000   | [34]       |
| Gene therapeutic cost                                                     | \$1,540,000 (\$2,234,540) |              | \$1,270,000 | \$2,100,000 | [36]       |
| Gene Tx follow-up cost                                                    | \$158 (\$230)             |              |             |             | [37]       |
| Gene Tx initial year cost                                                 | \$4,312 (\$4574)          |              |             |             | [37,38]    |
| Nusinersen Injection episode cost                                         | \$3,731 (\$5,414)         |              |             |             | [37,38]    |
| Nusinersen loading cost                                                   | \$318,164 (\$461,656)     |              |             |             | [2,39]     |
| Nusinersen maintenance cost                                               | \$119,311 (\$173,123)     |              | \$79,939    | \$131,242   | [2,39]     |
| Nusinersen one dose cost                                                  | \$75,810 (110,000)        |              | \$68,228    | \$83,390    | [39]       |
| Confirmatory diagnostic SCID testing cost (after positive screening test) | \$2119 (\$3,074)          |              |             |             | [13]       |
| Diagnostic SCID testing cost (without NBS)                                | \$3446 (\$5,000)          |              |             |             | [13]       |
| Pre-symptomatic SCID cost                                                 | \$0 (\$0)                 |              |             |             | Assumption |
| HSCT cost (early diagnosis)                                               | \$119,282 (\$173,078)     | Gamma        | -10%        | +10%        | [13]       |
| HSCT cost (late diagnosis)                                                | \$271,697 (\$394,233)     | Gamma        | -10%        | +10%        | [13]       |
| Treatment cost for SCID patient dying prior to HSCT                       | \$178,923 (\$259,617)     |              |             |             | [13]       |
| SCID Well treatment cost (per year)                                       | \$34 (\$50)               |              |             |             | [13]       |
| SCID Moderate treatment cost (per year)                                   | \$24,052 (\$34,900)       |              |             |             | [13]       |
| SCID Poor treatment cost (per year)                                       | \$12,873 (\$18,679)       |              |             |             | [13]       |
| End-of-life costs (SCID Moderate & SCID Poor)                             | \$41,841 (\$60,712)       |              |             |             | [13]       |

|                                                         |                                 |      |          |            |         |
|---------------------------------------------------------|---------------------------------|------|----------|------------|---------|
| SCID Well productivity cost                             | \$0 (\$0)                       |      |          | Assumption |         |
| SCID Moderate productivity cost                         | \$1,394 (\$2,023)               |      |          | [13]       |         |
| SCID Poor productivity cost                             | \$0 (\$0)                       |      |          | Assumption |         |
| Netherlands, 2016 PPP Euros/US\$                        | 0.796                           |      |          | [24]       |         |
| Australia, 2016 PPP AU\$/US\$                           | 1.45                            |      |          | [24]       |         |
| CPI inflation rate 2016 to 2019 AU\$                    | 0.0557                          |      |          | [40]       |         |
| Discount rate                                           | 0.03                            | -    | 0.05     |            |         |
| Outcome parameters                                      |                                 |      |          |            |         |
| SMA INCIDENCE                                           | 0.000091                        | Beta | 0.000065 | 0.000119   | [41]    |
| SMA 1 mortality                                         | 0.29                            | Beta | 0.227    | 0.353      | [42]    |
| SMA 2 mortality                                         | 0.004                           | Beta | 0.0025   | 0.0059     | [43]    |
| SMA 3 mortality                                         | Population background mortality |      |          |            |         |
| SMA phenotype (SMA1, SMA2, SMA3)                        | 0.58, 0.29, 0.13                |      |          | [43]       |         |
| False negative % in screen                              | 0.00000576                      |      |          | [25]       |         |
| Screen retest due to non-amplification                  | 0.012                           |      |          | [25]       |         |
| Further test % in screen                                | 0.0000854                       | Beta | 0.000038 | 0.000134   | [25]    |
| SMA confirmation in re-test                             | 1                               |      |          | [25]       |         |
| Motor milestone half-yearly transition                  |                                 |      |          |            |         |
| Non-sitter to sit in early gene therapy                 | 0.43                            | Beta | 0.35     | 0.50       | [2,44]  |
| Non-sitter to sit in late nusinersen Tx                 | 0.45                            | Beta | 0.40     | 0.50       | [45,46] |
| Sit to stand in early gene therapy                      | 0.84                            | Beta | 0.80     | 0.87       | [2,44]  |
| Sit to stand in late nusinersen Tx                      | 0.55                            |      |          | [45,46]    |         |
| Stand to assisted walk in early gene therapy            | 0.74                            | Beta | 0.70     | 0.78       | [2,44]  |
| Stand to assisted walk in late nusinersen Tx            | 0.21                            |      |          | [45,46]    |         |
| Walk assisted to independent walk in early gene therapy | 0.81                            | Beta | 0.73     | 0.88       | [2,44]  |
| Walk assisted to independent walk in late nusinersen Tx | 0.58                            |      |          | [45,46]    |         |
| SCID incidence                                          | 0.00002                         | Beta | 0.000012 | 0.000025   | [3,47]  |
| False Negative % in Screen (1-sensitivity)              | 0.005                           | Beta | 0        | 0.01       | [10]    |
| False Positive % in Screen (1-specificity)              | 0.0003                          | Beta | 0.0002   | 0.0008     | [10]    |
| % patients early diagnosed without NBS                  | 0.2                             | Beta | 0.1      | 0.3        | [9]     |

|                                                                |        |      |      |      |            |
|----------------------------------------------------------------|--------|------|------|------|------------|
| Probability to survive until treatment (early diagnosis)       | 0.9423 |      |      |      | [3]        |
| Probability to survive until treatment (late diagnosis)        | 0.78   |      |      |      | [10]       |
| 5-year survival (early diagnosis)                              | 0.94   | Beta | 0.91 | 0.98 | [48]       |
| 5-year survival (late diagnosis)                               | 0.82   | Beta | 0.7  | 0.9  | [48]       |
| SCID Well after HSCT (early diagnosis; surviving subjects)     | 0.8    |      |      |      | [13]       |
| SCID Moderate after HSCT (early diagnosis; surviving subjects) | 0.15   |      |      |      | [13]       |
| SCID Poor after HSCT (early diagnosis; surviving subjects)     | 0.05   |      |      |      | [13]       |
| SCID Well after HSCT (late diagnosis; surviving subjects)      | 0.5    |      |      |      | [13]       |
| SCID Moderate after HSCT (late diagnosis; surviving subjects)  | 0.3    |      |      |      | [13]       |
| SCID Poor after HSCT (late diagnosis; surviving subjects)      | 0.2    |      |      |      | [13]       |
| <b>Quality of life utility value</b>                           |        |      |      |      |            |
| Non-sitter                                                     | 0.02   |      |      |      | [15,34,49] |
| Sit without support                                            | 0.11   |      |      |      | [19,34,49] |
| Stand with assistance                                          | 0.25   |      |      |      | [34]       |
| Walk with assistance                                           | 0.38   |      |      |      | [49]       |
| Stand walk unaided                                             | 0.64   |      |      |      | [49]       |
| Utility value for presymptomatic SCID                          | 0.95   |      |      |      | Assumption |
| Utility value for SCID Well                                    | 0.95   |      |      |      | [13]       |
| Utility value for SCID Moderate                                | 0.75   |      |      |      | [13]       |
| Utility value for SCID Poor                                    | 0.5    |      |      |      | [13]       |
| Utility value for HSCT                                         | 0.5    |      |      |      | Assumption |
| Utility value for Deceased                                     | 0      |      |      |      | Assumption |
